# Supplementary material
Source: Springer Nature journal article supplement (https://www.springermedizin.de/resource/supplementary/13069_2013_130_MOESM6_ESM.pdf/9659844)

### Strict uninfl CD myofibroblasts

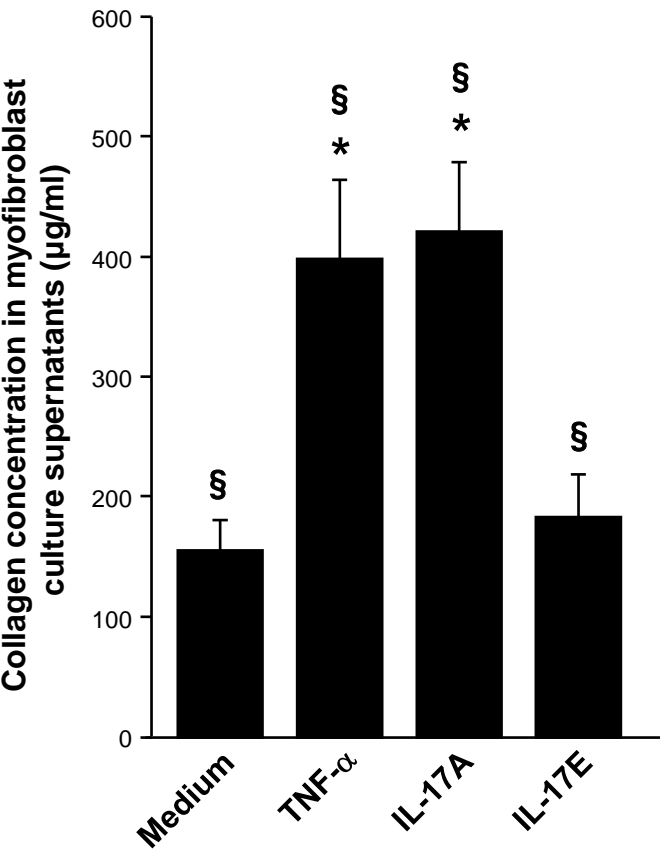

### Non-strict uninfl CD myofibroblasts

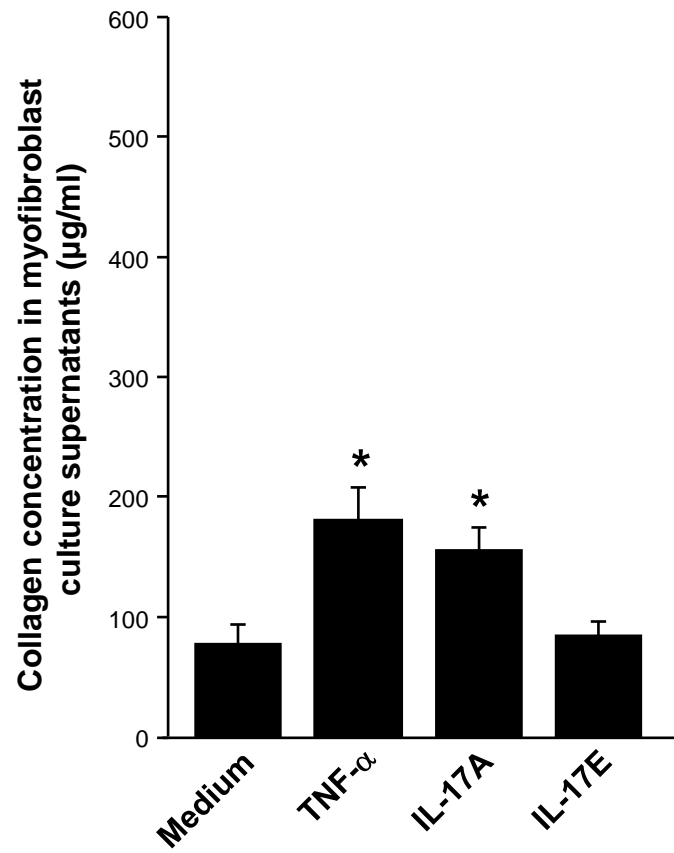

### HC myofibroblasts

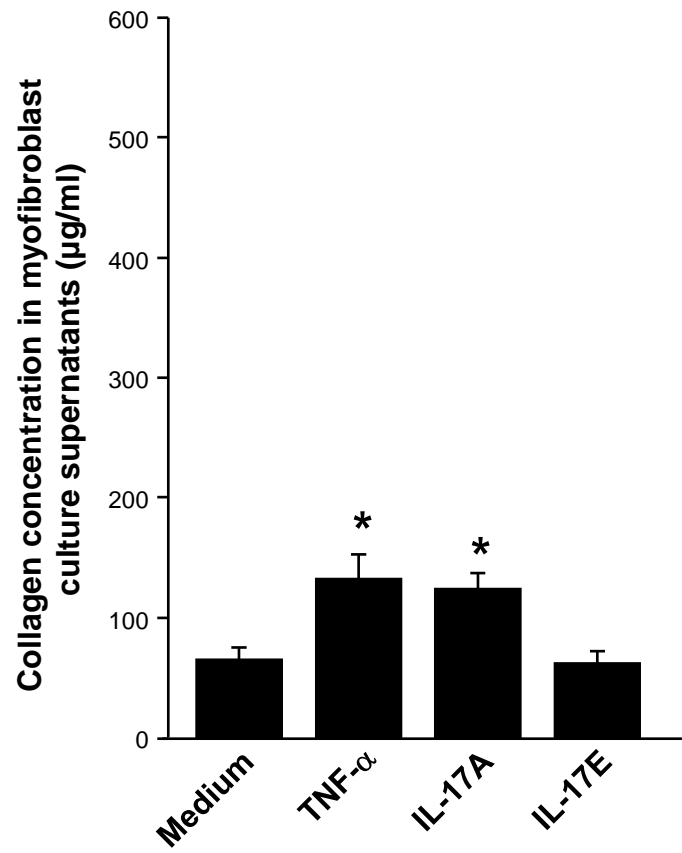

Supplement: MOESM6 [file 9659844]
